# Supplementary material
Source: Springer Nature journal article supplement (https://www.springermedizin.de/resource/supplementary/12958_2004_169_MOESM2_ESM.pdf/9567290)

1 2 3 4 5 6 7 8 9 10 11

A) ← 161 bp

B) ← 360 bp

C) ← 255 bp

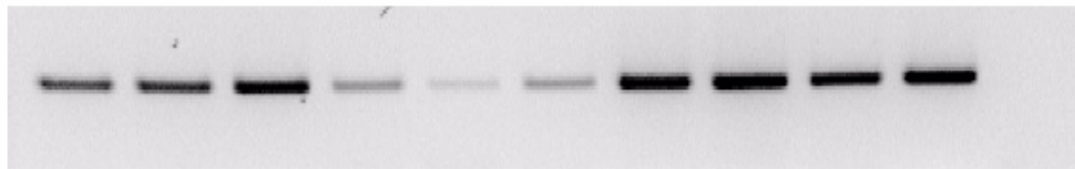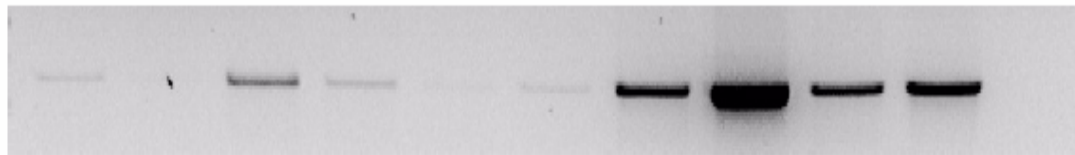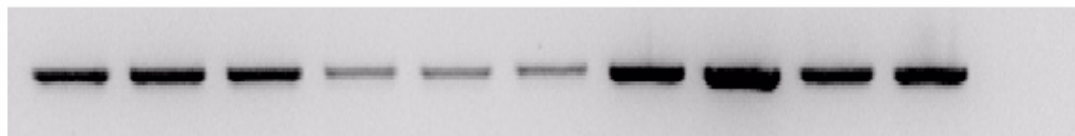

Supplement: MOESM2 [file 9567290]
